# Supplementary material for: Larvicidal Compounds Extracted from Helicteres velutina K. Schum (Sterculiaceae) Evaluated against Aedes aegypti L
Source: PubMed Central journal article supplement (PMC6631904; doi:10.3390/molecules24122315), 2019-06-22
Supplement: molecules-24-02315-s001.pdf [file molecules-24-02315-s001.pdf]

## Supporting information

# Larvicidal compounds extracted from *Helicteres velutina* K. Schum (Sterculiaceae) evaluated against *Aedes aegypti* L.

Diégina A. Fernandes <sup>1</sup>, Renata P. C. Barros <sup>1</sup>, Yanna C. F. Teles <sup>2</sup>, Louise H. G. Oliveira <sup>3</sup>,  
Jéssica B. Lima <sup>4</sup>, Marcus T. Scotti <sup>1</sup>, Fabíola C. Nunes <sup>3</sup>, Adilva S. Conceição <sup>4</sup> and Maria de  
Fátima Vanderlei de Souza <sup>1,5,\*</sup>

<sup>1</sup> Post graduation Program in Bioactive Natural and Synthetic Products; Federal University of Paraíba, 58051-900, João Pessoa, PB, Brazil; [diegina@ltf.ufpb.br](mailto:diegina@ltf.ufpb.br) (D.A.F.); [renatabarros@ltf.ufpb.br](mailto:renatabarros@ltf.ufpb.br) (R.P.C.B.); [mtscotti@gmail.com](mailto:mtscotti@gmail.com) (M.T.S.); [mfvanderlei@ltf.ufpb.br](mailto:mfvanderlei@ltf.ufpb.br) (M.F.V.S.)

<sup>2</sup> Department of Chemistry and Physics, Agrarian Sciences Center, Federal University of Paraíba, Areia, PB, Brazil; [yanna@cca.ufpb.br](mailto:yanna@cca.ufpb.br) (Y.C.F.T.)

<sup>3</sup> Biotechnology Center; Federal University of Paraíba, 58051-900, João Pessoa, PB, Brazil; [louiseguimaraes@outlook.com](mailto:louiseguimaraes@outlook.com) (L.H.G.O.); [fabiola@cbiotec.ufpb.br](mailto:fabiola@cbiotec.ufpb.br) (F.C.N.)

<sup>4</sup> Post graduation Program in Plant Biodiversity; University of the State of Bahia; Department of Education, 41150-000, Paulo Afonso, BA, Brazil; [jessica.bl@hotmail.com](mailto:jessica.bl@hotmail.com) (J.B.L); [adilva.souza@gmail.com](mailto:adilva.souza@gmail.com) (A.S.C.)

<sup>5</sup> Post graduation in Development and Technological Innovation in Medicines; Federal University of Paraíba, 58051-900, João Pessoa, PB, Brazil; [mfvanderlei@ltf.ufpb.br](mailto:mfvanderlei@ltf.ufpb.br) (M.F.V.S.)

\* Correspondence: [mfvanderlei@ltf.ufpb.br](mailto:mfvanderlei@ltf.ufpb.br); Tel.: +55-83-3216-7351; Fax: +55-83-3216-7351

**Table S1.** Mean of mortality of *A. aegypti* larvae (L4) in the tested concentrations of CEE fractions of *H. velutina*

| Fractions       | Concentration (mg/mL)  | % Mortality ± Standard Deviation | Fractions           | Concentration (mg/mL)                          | % Mortality ± Standard Deviation |
|-----------------|------------------------|----------------------------------|---------------------|------------------------------------------------|----------------------------------|
| Hexane          | 1.0 <sup>(a)*</sup>    | 3.0 ± 0.66                       | n-butanol           | 1.0 <sup>(h)</sup>                             | 13.0 ± 1.76                      |
|                 | 2.5                    | 35.0 ± 1.00                      |                     | 5.0 <sup>(h)</sup>                             | 15.0 ± 1.00                      |
|                 | 5.0                    | 96.5 ± 0.33                      |                     | 10.0 <sup>(h)</sup>                            | 16.5 ± 0.88                      |
|                 | 10.0                   | 95.0 ± 0.57                      |                     | 15.0 <sup>(h)</sup>                            | 11.5 ± 0.33                      |
|                 | 15.0                   | 100.0 ± 0                        |                     | 20.0                                           | 81.5 ± 0.88                      |
|                 | 20.0                   | 100.0 ± 0                        |                     | Hydroalcoholic                                 | 1.0 <sup>(i)</sup>               |
| Dichloromethane | 1.0 <sup>(b)</sup>     | 23.3 ± 2.18                      | 5.0 <sup>(i)</sup>  |                                                | 0 ± 0                            |
|                 | 5.0 <sup>(b)</sup>     | 23.3 ± 0.66                      | 10.0 <sup>(i)</sup> |                                                | 1.6 ± 0.57                       |
|                 | 7.5 <sup>(c)</sup>     | 71.5 ± 0.33                      | 15.0 <sup>(i)</sup> |                                                | 5.0 ± 1.00                       |
|                 | 10.0 <sup>(c)(d)</sup> | 88.0 ± 0.66                      | 20.0 <sup>(i)</sup> |                                                | 11.5 ± 0.33                      |
|                 | 15.0 <sup>(c)(d)</sup> | 81.5 ± 0.88                      | Negative Control    | H <sub>2</sub> O or H <sub>2</sub> O + DMSO 1% | 0 ± 0                            |
|                 |                        | (a) (e) (f) (h) (i)              |                     |                                                |                                  |
|                 | 20.0 <sup>(d)</sup>    | 96.5 ± 0.33                      | Positive Control    | Commercial larvicide                           | 100.0 ± 0                        |
| Ethyl acetate   | 1.0 <sup>(e)</sup>     | 5.0 ± 1.00                       |                     |                                                |                                  |
|                 | 5.0 <sup>(e)(f)</sup>  | 13.0 ± 0.33                      |                     |                                                |                                  |
|                 | 10.0 <sup>(f)(g)</sup> | 23.0 ± 0.66                      |                     |                                                |                                  |
|                 | 15.0 <sup>(g)</sup>    | 31.5 ± 0.88                      |                     |                                                |                                  |
|                 | 20.0                   | 65.0 ± 1.15                      |                     |                                                |                                  |

(\*) Means followed by the same letter are not significantly different by Tukey test, at 5% of probability.

**Table S2.** Mean of mortality of *A. aegypti* larvae (L4) in different concentrations of tested compounds

| Molecule                              | Concentration (mg/mL)                 | % Mortality ± Standard Deviation (Triplicate) |             |             |
|---------------------------------------|---------------------------------------|-----------------------------------------------|-------------|-------------|
|                                       |                                       | 24h                                           | 48h         | 72h         |
| Tiliroside                            | 0.1 (a)*                              | 0.0 ± 0.5                                     | 21.6 ± 1.3  | 46.6 ± 0.5  |
|                                       | 0.25                                  | 3.3 ± 0.5                                     | 43.3 ± 0.5  | 70.0 ± 1.0  |
|                                       | 0.50 (b) (c)                          | 6.6 ± 1.1                                     | 48.3 ± 0.5  | 83.3 ± 0.5  |
|                                       | 0.75 (c) (d)                          | 11.6 ± 0.5                                    | 60.0 ± 1.0  | 100.0 ± 1.0 |
|                                       | 1.0 (b) (d) (e)                       | 15.0 ± 1.0                                    | 60.0 ± 1.0  | 100.0 ± 1.0 |
| 7,4'-di-O-methyl-8-O-sulphate flavone | 0.05                                  | 11.6 ± 0.5                                    | 20,0 ± 1,0  | 20,0 ± 1,0  |
|                                       | 0.1                                   | 43.3 ± 0.5                                    | 48.3 ± 1.3  | 51.6 ± 0.5  |
|                                       | 0.25                                  | 58.3 ± 1.1                                    | 88.3 ± 1.5  | 100.0 ± 1.0 |
|                                       | 0.50                                  | 71.6 ± 0.5                                    | 93.3 ± 1.5  | 100.0 ± 1.0 |
|                                       | 1.0 (f)                               | 90.0 ± 1.0                                    | 100.0 ± 1.0 | 100.0 ± 1.0 |
| 7,4'-di-O-methyl isoscutellarein      | 1.0                                   | 21.6 ± 1.5                                    | 21.6 ± 1.5  | 21.6 ± 1.5  |
| Negative Control                      | H <sub>2</sub> O + DMSO<br>1% (a) (e) | 0.0 ± 0                                       | 0.0 ± 0     | 0.0 ± 0     |
| Positive Control                      | Commercial<br>larvicide (b) (c) (f)   | 100.0 ± 0                                     | -           | -           |

(\*) Means followed by the same letter are not significantly different by Tukey test, at a level of 5% of probability.
